# Supplementary material
Source: publisher figshare collection journal article supplement (https://diabetesjournals.figshare.com/ndownloader/files/24212333)
Supplement: Supplementary file 1 [file 24212333]

Supplemental Table S1. Back transformed value for BMI, glucose, and insulin for z-scores of -1, 0, 0.5, and 1

| Variable           | Sex    | z-score | Age 3-5 | Age 6-8 | Age 9-11 | Age 12-14 | Age 15-17 | Age 18-19 |
|--------------------|--------|---------|---------|---------|----------|-----------|-----------|-----------|
| BMI (kg/m2)        | Male   | -1      | 14.2    | 14.3    | 14.9     | 16.3      | 18.1      | 19.0      |
|                    |        | 0       | 15.9    | 16.6    | 18.1     | 20.1      | 22.0      | 23.1      |
|                    |        | 0.5     | 16.8    | 17.8    | 19.7     | 22.0      | 24.0      | 25.2      |
|                    |        | 1       | 17.7    | 18.9    | 21.2     | 23.9      | 25.9      | 27.2      |
|                    | Female | -1      | 13.8    | 14.0    | 14.8     | 16.5      | 17.7      | 18.0      |
|                    |        | 0       | 15.8    | 16.5    | 18.3     | 20.8      | 22.5      | 23.6      |
|                    |        | 0.5     | 16.8    | 17.8    | 20.1     | 23.0      | 24.9      | 26.5      |
|                    |        | 1       | 17.7    | 19      | 21.8     | 25.2      | 27.2      | 29.3      |
| Glucose (mg/dl)    | Male   | -1      | 70.8    | 71.7    | 75.1     | 78.4      | 76.8      | 74.8      |
|                    |        | 0       | 81.0    | 82.3    | 84.5     | 87.3      | 86.1      | 86.1      |
|                    |        | 0.5     | 86.1    | 87.6    | 89.2     | 91.7      | 90.7      | 91.7      |
|                    |        | 1       | 91.1    | 92.9    | 93.9     | 96.1      | 95.2      | 97.3      |
|                    | Female | -1      | 69.5    | 71.5    | 74.1     | 75.7      | 67.3      | 67.7      |
|                    |        | 0       | 78.9    | 80.4    | 84.9     | 85.1      | 80.9      | 83.6      |
|                    |        | 0.5     | 83.8    | 84.8    | 90.4     | 89.9      | 87.8      | 91.5      |
|                    |        | 1       | 88.4    | 89.2    | 95.8     | 94.6      | 94.6      | 99.4      |
| Insulin (microM/L) | male   | -1      | 2.1     | 3.3     | 4.3      | 5.5       | 5.9       | 5.7       |
|                    |        | 0       | 4.6     | 6.2     | 7.4      | 9.7       | 10.5      | 10.2      |
|                    |        | 0.5     | 7.5     | 8.9     | 10.2     | 13.3      | 14.7      | 14.3      |
|                    |        | 1       | 10.3    | 11.6    | 12.9     | 16.9      | 18.8      | 18.3      |
|                    | female | -1      | 2.4     | 3.8     | 4.9      | 7.1       | 7.0       | 5.5       |
|                    |        | 0       | 5.1     | 7.0     | 9.3      | 12.1      | 11.9      | 10.0      |
|                    |        | 0.5     | 8.1     | 9.9     | 13.5     | 16.4      | 16.2      | 14.1      |
|                    |        | 1       | 11.0    | 12.7    | 17.6     | 20.6      | 20.5      | 18.1      |

BMI: Body mass index

Supplemental Table S2. Descriptive characteristics in participants included in the analytic sample (black and white participants with childhood BMI and glucose measures both available) vs. not included (all others with followup age  $\geq 20$  years and with any childhood anthropometric or laboratory measure available), Total N = 18,626.

|                                                                   | Included in analytic sample | Not included in analytic sample | P difference |
|-------------------------------------------------------------------|-----------------------------|---------------------------------|--------------|
| N (otherwise noted)                                               | 6,738                       | 11,888                          |              |
| Adult T2DM, n (%)                                                 | 436 (6.5%)                  | 713 (6.0%)                      | 0.20         |
| Male, n (%)                                                       | 2,722 (40.4%)               | 5,517 (46.4%)                   | <0.001       |
| Race, n (%)                                                       |                             |                                 | <0.001       |
| US Black                                                          | 1,926 (28.6%)               | 257 (2.2%)                      |              |
| Others                                                            | 0 (0.0%)                    | 363 (3.1%)                      |              |
| Cohort, n (%)                                                     |                             |                                 | <0.001       |
| Bogalusa Heart Study                                              | 3,326 (47.9%)               | 205 (1.7%)                      |              |
| Childhood Determinants of Adult Health Study                      | 0 (0.0%)                    | 3,036 (25.5%)                   |              |
| Minneapolis Children's Cohort                                     | 490 (7.3%)                  | 686 (5.8%)                      |              |
| Muscatine Study                                                   | 0 (0.0%)                    | 6,039 (50.8%)                   |              |
| National Heart, Lung, and Blood Institute Growth and Health Study | 437 (6.5%)                  | 62 (0.5%)                       |              |
| Princeton Lipid Research Study                                    | 788 (11.7%)                 | 71 (0.6%)                       |              |
| Young Finns Study                                                 | 1,797 (26.7%)               | 1,789 (15.1%)                   |              |
| Child BMI z-score                                                 | -0.06 (0.99)                | -0.12 (0.80)*                   | <0.001       |
| Child Glucose z-score                                             | 0.01 (0.82)                 | 1.10 (3.77)†                    | 0.020        |
| Child ln(insulin) z-score                                         | -0.02 (0.82)                | 0.09 (0.83)‡                    | <0.001       |
| Age of first child measurement, year                              | 12.1 (3.1)                  | 12.5 (3.1)*                     | <0.001       |

BMI: body mass index; T2DM: type-2 diabetes mellitus

\*N=11,882 (not included due to missing glucose)

†N=68 (not included due to participant being of other race)

‡N=5,196 (included) and 1,818 (not included due to missing glucose, mostly in the Young Finn study, where glucose was not assessed at study baseline, but was assessed at a later visit after some participants had aged out of childhood)

Supplemental Table S3. Multivariable analysis for the association of childhood BMI and ln(Insulin) z-scores with adult T2DM \*

| Model                       |             | Overall           | BHS               | YFS               | NHGS+MN Insulin   |
|-----------------------------|-------------|-------------------|-------------------|-------------------|-------------------|
|                             | n T2DM/N    | 388/6,576         | 199/2,610         | 174/3,560         | 15/794            |
| Multivariable model         |             |                   |                   |                   |                   |
| BMI                         | HR (95% CI) | 1.50 (1.37, 1.65) | 1.41 (1.26, 1.57) | 1.79 (1.47, 2.17) | 1.61 (1.09, 2.35) |
|                             | P           | <0.001            | <0.001            | <0.001            | 0.016             |
| ln(insulin)                 | HR (95% CI) | 1.31 (1.14, 1.49) | 1.31 (1.11, 1.55) | 1.15 (0.92, 1.45) | 2.30 (1.30, 4.08) |
|                             | P           | <0.001            | 0.001             | 0.222             | 0.004             |
| Risk score model            |             |                   |                   |                   |                   |
| Mean of BMI and ln(insulin) | HR (95% CI) | 2.03 (1.81, 2.28) | 1.89 (1.63, 2.18) | 2.17 (1.70, 2.76) | 3.33 (2.06, 5.38) |
|                             | P           | <0.001            | <0.001            | <0.001            | <0.001            |

BMI: Body mass index; T2DM: type-2 diabetes mellitus

\* Cox regression analysis with childhood BMI and ln(Insulin) z-scores. Z-scores are age-sex standard deviates based on the i3C distribution. Adjustment is for individual mean age and calendar year across child visits, sex, race, country, and cohort. The time to event was computed as age at T2DM occurrence or censoring minus individual mean age across childhood visits. Princeton has no childhood insulin data.

Supplemental Table S4. Multivariable analysis for the association of childhood BMI and glucose z-scores with adult T2DM, according to childhood BMI levels \*

| Risk factor models                             | BMI below age- and sex- average |        | BMI at or above age- and sex- average |        |
|------------------------------------------------|---------------------------------|--------|---------------------------------------|--------|
|                                                | Hazard ratio (95% CI)           | P      | Hazard ratio (95% CI)                 | P      |
| BMI and glucose                                |                                 |        |                                       |        |
| n T2DM/N                                       | 215/4,400                       |        | 221/2,338                             |        |
| Multivariable model                            |                                 |        |                                       |        |
| BMI z-score                                    | 1.35 (0.92, 1.97)               | 0.123  | 1.46 (1.30, 1.63)                     | <0.001 |
| Glucose z-score                                | 1.21 (1.07, 1.36)               | 0.002  | 1.33 (1.12, 1.59)                     | 0.001  |
| Risk score model:                              |                                 |        |                                       |        |
| Mean of BMI and glucose z-scores               | 1.49 (1.19, 1.86)               | <0.001 | 2.00 (1.69, 2.36)                     | <0.001 |
| BMI, glucose, and ln(insulin)                  |                                 |        |                                       |        |
| n T2DM/N                                       | 133/3,363                       |        | 151/1,833                             |        |
| Multivariable model                            |                                 |        |                                       |        |
| BMI z-score                                    | 1.30 (0.79, 2.12)               | 0.302  | 1.31 (1.14, 1.50)                     | <0.001 |
| Glucose z-score                                | 1.21 (1.05, 1.39)               | 0.008  | 1.31 (1.03, 1.68)                     | 0.029  |
| ln(insulin) z-score                            | 1.15 (0.92, 1.44)               | 0.227  | 1.47 (1.20, 1.79)                     | <0.001 |
| Risk score model:                              |                                 |        |                                       |        |
| Mean of BMI, glucose, and ln(insulin) z-scores | 1.70 (1.22, 2.38)               | 0.002  | 2.50 (1.99, 3.14)                     | <0.001 |

BMI: Body mass index; T2DM: type-2 diabetes mellitus

\* Cox regression analysis with childhood BMI and glucose z-scores. Z-scores are age-sex standard deviates based on the i3C distribution. Adjustment is for individual mean age and calendar year across child visits, sex, race, country, and cohort. The time to event was computed as age at T2DM occurrence or censoring minus individual mean age across childhood visits. P for interaction >0.10 except for comparison of mean of BMI and glucose z-scores, P for interaction = 0.03.

Supplemental Table S5. Multivariable analysis for comparison of the association of childhood BMI, glucose, and ln(insulin) z-scores with adult T2DM in Black and White participants

| Model               |                  | Overall                     | Black                       | White                       |
|---------------------|------------------|-----------------------------|-----------------------------|-----------------------------|
|                     | N T2DM/N         | 436/6,738                   | 144/1,926                   | 292/4,812                   |
| Multivariable model |                  |                             |                             |                             |
| BMI                 | HR (95% CI)<br>P | 1.55 (1.44, 1.67)<br><0.001 | 1.40 (1.24, 1.57)<br><0.001 | 1.66 (1.51, 1.83)<br><0.001 |
| Glucose             | HR (95% CI)<br>P | 1.24 (1.13, 1.35)<br><0.001 | 1.20 (0.98, 1.48)<br>0.080  | 1.26 (1.14, 1.39)<br><0.001 |
|                     | N T2DM/N         | 284/5,196                   | 98/1,529                    | 186/3,667                   |
| Multivariable model |                  |                             |                             |                             |
| BMI                 | HR (95% CI)<br>P | 1.44 (1.31, 1.59)<br><0.001 | 1.31 (1.12, 1.53)<br><0.001 | 1.54 (1.36, 1.74)<br><0.001 |
| Glucose             | HR (95% CI)<br>P | 1.23 (1.10, 1.37)<br><0.001 | 1.20 (0.90, 1.61)<br>0.212  | 1.24 (1.10, 1.39)<br><0.001 |
| ln(insulin)         | HR (95% CI)<br>P | 1.34 (1.16, 1.56)<br><0.001 | 1.35 (1.07, 1.71)<br>0.011  | 1.31 (1.08, 1.60)<br>0.007  |

BMI: Body mass index; T2DM: type-2 diabetes mellitus

\* Cox regression analysis with childhood variable z-scores. Z-scores are age-sex standardized deviates based on the i3C distribution. Adjustment is for individual mean age and calendar year across child visits, sex, race, country, and cohort.

The time to event was computed as age at T2DM occurrence or censoring minus individual mean age across child visits.

P values for interaction by race in the analysis of BMI, glucose and insulin were all greater than 0.15.
